# Supplementary material for: Mast cell-T cell axis alters development of colitis-dependent and colitis-independent colorectal tumours: potential for therapeutically targeting via mast cell inhibition
Source: PubMed Central journal article supplement — J Immunother Cancer. 2022 Oct 11;10(10):e004653. doi: 10.1136/jitc-2022-004653 (PMC9557261; doi:10.1136/jitc-2022-004653), 2022-10-11
Supplement: jitc-2022-004653supp002.pdf [file jitc-2022-004653supp002.pdf]

**Suppl. Tab. 1.** List of TaqMan Probes used in the study.

| Targets       | Probes ID  |
|---------------|------------|
| <i>Ctnnb1</i> | Mm00483039 |
| <i>Gapdh</i>  | Mm99999915 |
| <i>Mki67</i>  | Mm01278617 |
| <i>Mgmt</i>   | Mm00485014 |

**Suppl. Tab. 2.** List of qPCR SYBR primer sequences used in the study.

| Primers | Sequences             |
|---------|-----------------------|
| Cd11c F | TCTTCTGCTGTTGGGGTTTG  |
| Cd11c R | CAGTTGCCTGTGTGATAGCC  |
| Cd4 F   | TCTGGCAACCTGACTCTGAC  |
| Cd4 R   | TCATCACCACCAGGTTCACT  |
| Cd8 F   | CAGAGACCAGAAGATTGTCTG |
| Cd8 R   | TGATCAAGGACAGCAGAAGG  |
| Cd3 F   | ATGCGGTGGAACACTTTCTGG |
| Cd3 R   | GCACGTCAACTCTACACTGGT |
| Foxp3 F | GGCCCTTCTCCAGGACAGA   |
| Foxp3 R | GCTGATCATGGCTGGGTTGT  |
| Mcpt1 F | TTCCAGGTCTGTGTGGGAAG  |
| Mcpt1 R | TCCAGGGCACATATGCAGAG  |
| Mcpt4 F | TCACCACTGAGAGAGGGTTCA |
| Mcpt4 R | CATGAGCTCCAAGGGTGACA  |
| Mcpt6 F | ACGTTGCCCTGCTGGAGCTT  |
| Mcpt6 R | CAGCACGATGTCCCTGGGGG  |
| Gapdh F | TGGTGAAGGTCCGGTGTGAAC |
| Gapdh R | GACAAGCTTCCCATTCTCGG  |

**Suppl. Tab. 3.** List of primary antibodies used in the study.

| Antibodies          | ID         | Concentration |
|---------------------|------------|---------------|
| Cd8                 | Ab203035   | 1:150         |
| Cd3                 | Ab5690     | 1:500         |
| GAPDH               | Ab181602   | 1:10000       |
| Mki67               | Ab16667    | 1:150         |
| Triptase            | Ab2378     | 1:150         |
| $\gamma$ H2AX       | Ab81299    | 1:5000        |
| CD45-FITC           | 11-0451-82 | 1:250         |
| Cd45-APC            | 561873     | 1:250         |
| CD45-BV421          | 103133     | 1:300         |
| CD117-PE-Cy7        | 55863      | 1:250         |
| Fc $\epsilon$ RI-PE | 134307     | 1:250         |
| CD8a-PE             | 553032     | 1:300         |
| CD3-FITC            | 557354     | 1:250         |
| CD4-FITC            | 100405     | 1:300         |
| Foxp3-APC           | 77-5775-40 | 1:300         |

**Suppl. Tab. 4.** Significantly altered genes by MC deficiency in sCRC lesions. Data were obtained by RNA-seq.

| Name                                                                                   | Acronym        | log2FC  | p-Adj    | p-Value  |
|----------------------------------------------------------------------------------------|----------------|---------|----------|----------|
| <b>Upregulated genes</b>                                                               |                |         |          |          |
| Chemokine (C-X-C motif) ligand 2                                                       | <i>Cxcl2</i>   | 2.91762 | 5.50E-05 | 1.20E-07 |
| Interleukin 6                                                                          | <i>Il6</i>     | 2.76768 | 6.93E-03 | 2.88E-04 |
| Chemokine (C-X-C motif) ligand 1                                                       | <i>Cxcl1</i>   | 2.41013 | 2.15E-03 | 3.29E-05 |
| Colony stimulating factor 2                                                            | <i>Csf2</i>    | 2.39663 | 2.15E-03 | 3.16E-05 |
| Interleukin 1 $\alpha$                                                                 | <i>Il1a</i>    | 2.32562 | 1.70E-03 | 1.67E-05 |
| Chemokine (C-X-C motif) ligand 3                                                       | <i>Cxcl3</i>   | 2.17899 | 3.52E-03 | 1.04E-04 |
| Formyl peptide receptor 1                                                              | <i>Fpr1</i>    | 2.13251 | 3.99E-04 | 2.18E-06 |
| Chemokine (C-C motif) ligand 4                                                         | <i>Ccl4</i>    | 2.1307  | 4.82E-03 | 1.57E-04 |
| Interleukin 17A                                                                        | <i>Il17a</i>   | 2.11911 | 1.90E-02 | 1.12E-03 |
| Interleukin 1 $\beta$                                                                  | <i>Il1b</i>    | 2.107   | 4.82E-03 | 1.58E-04 |
| Chemokine (C-C motif) ligand 3                                                         | <i>Ccl3</i>    | 1.89559 | 1.13E-02 | 5.05E-04 |
| Nitric oxide synthase 2, inducible                                                     | <i>Nos2</i>    | 1.73595 | 1.70E-03 | 1.51E-05 |
| Chemokine (C-C motif) receptor 10                                                      | <i>Ccr10</i>   | 1.68575 | 2.81E-02 | 2.25E-03 |
| Chemokine (C-X-C motif) receptor 2                                                     | <i>Cxcr2</i>   | 1.6386  | 1.13E-03 | 7.43E-06 |
| Histidine decarboxylase                                                                | <i>Hdc</i>     | 1.59195 | 3.94E-04 | 1.72E-06 |
| Regulator of G-protein signaling 16                                                    | <i>Rgs16</i>   | 1.54682 | 2.90E-03 | 6.99E-05 |
| Chitinase-like 1                                                                       | <i>Chil1</i>   | 1.50777 | 3.08E-03 | 8.43E-05 |
| G0/G1 switch gene 2                                                                    | <i>G0s2</i>    | 1.49325 | 2.94E-02 | 2.41E-03 |
| Tumor necrosis factor receptor superfamily, member 9                                   | <i>Tnfrsf9</i> | 1.47377 | 3.63E-02 | 3.01E-03 |
| Arginase 2                                                                             | <i>Arg2</i>    | 1.38296 | 2.15E-03 | 2.75E-05 |
| Formyl peptide receptor 2                                                              | <i>Fpr2</i>    | 1.38215 | 1.22E-02 | 6.10E-04 |
| Tumor necrosis factor (ligand) superfamily, member 9                                   | <i>Tnfsf9</i>  | 1.33416 | 6.27E-03 | 2.54E-04 |
| Interleukin 33                                                                         | <i>Il33</i>    | 1.29891 | 5.47E-03 | 2.05E-04 |
| CD80 antigen                                                                           | <i>Cd80</i>    | 1.25429 | 1.97E-02 | 1.19E-03 |
| Selectin, platelet                                                                     | <i>Selp</i>    | 1.2436  | 2.66E-03 | 5.53E-05 |
| Granzyme B                                                                             | <i>Gzmb</i>    | 1.10501 | 5.47E-03 | 2.15E-04 |
| Inositol polyphosphate-4-phosphatase, type II                                          | <i>Inpp4b</i>  | 1.04564 | 2.68E-02 | 2.09E-03 |
| Serine hydroxymethylTransferase 2 (mitochondrial)                                      | <i>Shmt2</i>   | 0.97879 | 3.63E-04 | 1.19E-06 |
| Nuclear factor of kappa light polypeptide gene enhancer in B cells inhibitor, $\alpha$ | <i>Nfkbia</i>  | 0.96189 | 1.70E-03 | 1.39E-05 |
| CD14 antigen                                                                           | <i>Cd14</i>    | 0.87987 | 2.19E-03 | 3.82E-05 |
| Helicase, lymphoid specific                                                            | <i>Hells</i>   | 0.87468 | 2.19E-03 | 4.01E-05 |
| Cell division cycle 7                                                                  | <i>Cdc7</i>    | 0.83777 | 2.05E-02 | 1.31E-03 |

|                                                                         |                  |         |          |          |
|-------------------------------------------------------------------------|------------------|---------|----------|----------|
| Tumor necrosis factor receptor superfamily, member 1b                   | <i>Tnfrsf1b</i>  | 0.71521 | 2.02E-03 | 2.20E-05 |
| Serine/arginine-rich splicing factor 7                                  | <i>Srsf7</i>     | 0.71185 | 5.47E-03 | 2.09E-04 |
| BORA Aurora Kinase A Activator                                          | <i>Bora</i>      | 0.69255 | 2.40E-02 | 1.73E-03 |
| Activating transcription factor 4                                       | <i>Atf4</i>      | 0.68931 | 2.12E-02 | 1.41E-03 |
| Dystrobrevin, beta                                                      | <i>Dtnb</i>      | 0.65154 | 3.81E-02 | 3.25E-03 |
| Regulatory factor X-associated protein                                  | <i>Rfxap</i>     | 0.56539 | 4.28E-02 | 3.74E-03 |
| Sphingomyelin synthase 1                                                | <i>Sgms1</i>     | 0.46723 | 2.99E-03 | 7.83E-05 |
| DEAD (Asp-Glu-Ala-Asp) box polypeptide 17                               | <i>Ddx17</i>     | 0.43006 | 2.29E-02 | 1.58E-03 |
| <b>Downregulated genes</b>                                              |                  |         |          |          |
| Serine (or cysteine) peptidase inhibitor, clade A, member 1D            | <i>Serpina1d</i> | -5.0011 | 1.22E-02 | 6.16E-04 |
| Somatostatin receptor 3                                                 | <i>Sstr3</i>     | -4.0509 | 7.35E-03 | 3.14E-04 |
| Carboxypeptidase A3, mast cell                                          | <i>Cpa3</i>      | -3.6243 | 2.15E-03 | 3.08E-05 |
| Chromogranin B                                                          | <i>Chgb</i>      | -2.3208 | 4.90E-03 | 1.66E-04 |
| Endothelin 2                                                            | <i>Edn2</i>      | -2.1053 | 1.14E-02 | 5.22E-04 |
| Monoamine oxidase B                                                     | <i>Maob</i>      | -2.0844 | 1.97E-02 | 1.21E-03 |
| Collagen, type VIII, alpha 2                                            | <i>Col8a2</i>    | -1.9191 | 4.87E-02 | 4.38E-03 |
| Carcinoembryonic antigen-related cell adhesion molecule 13              | <i>Ceacam13</i>  | -1.9147 | 1.14E-02 | 5.49E-04 |
| RAR-related orphan receptor gamma                                       | <i>Rorc</i>      | -1.9034 | 1.14E-02 | 5.49E-04 |
| Vitamin D receptor                                                      | <i>Vdr</i>       | -1.8635 | 2.40E-02 | 1.72E-03 |
| Chemokine (C motif) ligand 1                                            | <i>Xcl1</i>      | -1.8057 | 5.47E-03 | 2.08E-04 |
| Solute carrier family 24 (sodium/potassium/calcium exchanger), member 3 | <i>Slc24a3</i>   | -1.7958 | 1.37E-02 | 7.17E-04 |
| Hydroxyprostaglandin dehydrogenase 15 (NAD)                             | <i>Hpgd</i>      | -1.7713 | 2.05E-02 | 1.35E-03 |
| Kit oncogene                                                            | <i>Kit</i>       | -1.6707 | 5.47E-03 | 2.11E-04 |
| Fibroblast growth factor 18                                             | <i>Fgf18</i>     | -1.6239 | 3.35E-03 | 9.53E-05 |
| RAB38, member RAS oncogene family                                       | <i>Rab38</i>     | -1.4745 | 2.05E-02 | 1.34E-03 |
| Myosin XVB                                                              | <i>Myo15b</i>    | -1.4343 | 2.68E-02 | 2.07E-03 |
| MHC I like leukocyte 2                                                  | <i>Mill2</i>     | -1.4073 | 2.58E-02 | 1.92E-03 |
| SH3 domain and tetratricopeptide repeats 1                              | <i>Sh3tc1</i>    | -1.3104 | 1.38E-02 | 7.41E-04 |
| Glucosaminyl (N-acetyl) transferase 1, core 2                           | <i>Gcnt1</i>     | -1.1739 | 4.10E-02 | 3.54E-03 |
| Myocyte enhancer factor 2C                                              | <i>Mef2c</i>     | -1.1546 | 3.68E-03 | 1.13E-04 |
| Melanophilin                                                            | <i>Mlph</i>      | -1.1311 | 2.58E-02 | 1.89E-03 |
| KN motif and ankyrin repeat domains 2                                   | <i>Kank2</i>     | -1.0783 | 1.38E-02 | 7.55E-04 |

|                                                              |                                |         |          |          |
|--------------------------------------------------------------|--------------------------------|---------|----------|----------|
| Prostaglandin-endoperoxide synthase 1                        | <i>Ptgs1</i>                   | -1.0425 | 1.71E-02 | 9.74E-04 |
| Inositol polyphosphate-4-phosphatase, type II                | <i>Inpp4b</i>                  | -1.0258 | 2.84E-03 | 6.53E-05 |
| Epithelial membrane protein 1                                | <i>Emp1</i>                    | -0.9828 | 1.26E-02 | 6.50E-04 |
| Erb-b2 receptor tyrosine kinase 2                            | <i>ErbB2</i>                   | -0.9277 | 2.99E-03 | 7.84E-05 |
| Interleukin 15                                               | <i>Il15</i>                    | -0.8982 | 3.80E-02 | 3.21E-03 |
| Avian musculoaponeurotic fibrosarcoma oncogene homolog       | <i>Kank2</i>                   | -0.888  | 2.81E-02 | 2.27E-03 |
| RNA binding motif protein 3                                  | <i>Rbm3</i>                    | -0.8148 | 4.50E-02 | 3.99E-03 |
| Zinc finger E-box binding homeobox 1                         | <i>Zeb1</i>                    | -0.8086 | 2.19E-03 | 4.21E-05 |
| ATPase Phospholipid Transporting 9A (Putative)               | <i>Atp9a</i>                   | -0.7628 | 1.88E-02 | 1.09E-03 |
| Serine (or cysteine) peptidase inhibitor, clade B, member 6a | <i>Serpinb6a</i>               | -0.7483 | 2.19E-02 | 1.48E-03 |
| Cathepsin S                                                  | <i>Ctss</i>                    | -0.7402 | 4.87E-02 | 4.42E-03 |
| Glypican 4                                                   | <i>Gpc4</i>                    | -0.7059 | 2.03E-05 | 2.22E-08 |
| Forkhead box N3                                              | <i>Foxn3</i>                   | -0.6665 | 2.19E-03 | 4.31E-05 |
| Sphingomyelin phosphodiesterase 3, neutral                   | <i>Smpd3</i>                   | -0.6579 | 2.68E-02 | 2.10E-03 |
| Proteasome (prosome, macropain) 26S subunit, non-ATPase, 11  | <i>Psmc11</i>                  | -0.6125 | 2.75E-03 | 6.02E-05 |
| Nuclear mitotic apparatus protein 1                          | <i>Numa1</i>                   | -0.5496 | 1.71E-02 | 9.65E-04 |
| Catalase                                                     | <i>Cat</i>                     | -0.5231 | 1.13E-02 | 5.07E-04 |
| Protein phosphatase 1, regulatory (inhibitor) subunit 2      | <i>Ppp1r2</i>                  | -0.5019 | 2.68E-02 | 2.11E-03 |
| von Willebrand factor A domain containing 5A                 | <i>Vwa5a</i>                   | -0.4409 | 1.97E-02 | 1.23E-03 |
| Inhibitor of kappaB kinase $\gamma$                          | <i>Ikbk<math>\gamma</math></i> | -0.4047 | 2.29E-02 | 1.60E-03 |

According to their log<sub>2</sub>FC values, genes are shown in descending order.

**Suppl. Tab. 5:** Pathways significantly altered by MC deficiency in sCRC lesions. Data were obtained by RNA-seq and analysed on DAVID (Bioinformatic Database).

| Pathway                                      | Status        | p-Value  | Genes                                                                                                  |
|----------------------------------------------|---------------|----------|--------------------------------------------------------------------------------------------------------|
| Cytokine-cytokine receptor interaction       | Upregulated   | 9,80E-11 | <i>Ccl3, Ccl4, Ccr10, Cxcl1, Cxcl2, Cxcr2, Csf2, Il1a, Il1b, Il17a, Il6, Tnfsf9, Tnfrsf1b, Tnfrsf9</i> |
|                                              | Downregulated | 9,80E-11 | <i>Xcl1, Il15</i>                                                                                      |
| TNF signaling                                | Upregulated   | 4,40E-09 | <i>Atf4; Cxcl1, Cxcl2, Cxcl3, Csf2, Il1b, Il6, Nfkbia, Tnfrsf1b</i>                                    |
|                                              | Downregulated | 4,40E-09 | <i>Ikkbg, Il15</i>                                                                                     |
| Toll-like receptor signaling                 | Upregulated   | 7,50E-06 | <i>Cd14, Cd80, Ccl3, Ccl4, Il1b, Il6, Nfkbia</i>                                                       |
|                                              | Downregulated | 7,50E-06 | <i>Ikkbg</i>                                                                                           |
| Chemokine signaling                          | Upregulated   | 1,00E-05 | <i>Ccl3, Ccl4, Ccr10, Cxcl1, Cxcl2, Cxcl3, Cxcr2, Nfkbia</i>                                           |
|                                              | Downregulated | 1,00E-05 | <i>Ikkbg, Xcl1</i>                                                                                     |
| NOD-like receptor signaling                  | Upregulated   | 5,40E-05 | <i>Cxcl1, Cxcl2, Il1b, Il6, Nfkbia</i>                                                                 |
|                                              | Downregulated | 5,40E-05 | <i>Ikkbg</i>                                                                                           |
| Inflammatory bowel disease (IBD)             | Upregulated   | 6,30E-05 | <i>Il1a, Il1b, Il17a, Il6</i>                                                                          |
| Cytosolic DNA-sensing                        | Upregulated   | 9,40E-05 | <i>Ccl4, Il1b, Il33, Il6, Nfkbia</i>                                                                   |
|                                              | Downregulated | 9,40E-05 | <i>Ikkbg</i>                                                                                           |
| Transcriptional dysregulation in cancer      | Upregulated   | 1,20E-03 | <i>Cd14, Csf2, Gzmb, Il6</i>                                                                           |
|                                              | Downregulated | 1,20E-03 | <i>Maf, Hpgd, Mef2c</i>                                                                                |
| Intestinal immune network for IgA production | Upregulated   | 3,40E-03 | <i>Cd80, Ccr10, Il15, Il6</i>                                                                          |
| NF- $\kappa$ B signaling                     | Upregulated   | 5,30E-03 | <i>Cd14, Ccl4, Il1b, Nfkbia</i>                                                                        |

Acronyms meaning is given in Suppl. Tab. 4.

**Suppl. Tab. 6.** Significantly altered genes by MC deficiency in early colon tumorigenic lesions. Data were obtained by RNA-seq.

| Name                                                                                   | Acronym          | log2FC  | p-Adj    | p-Value  |
|----------------------------------------------------------------------------------------|------------------|---------|----------|----------|
| <b>Upregulated genes</b>                                                               |                  |         |          |          |
| Chemokine (C-X-C motif) ligand 5                                                       | <i>Cxcl5</i>     | 3.22413 | 1.82E-02 | 1.62E-03 |
| Chemokine (C-X-C motif) ligand 13                                                      | <i>Cxcl13</i>    | 2.58874 | 2.24E-06 | 4.79E-08 |
| Chemokine (C-X-C motif) receptor 5                                                     | <i>Cxcr5</i>     | 2.51089 | 2.29E-06 | 5.14E-08 |
| Z-DNA binding protein 1                                                                | <i>Zbp1</i>      | 2.1316  | 3.00E-04 | 1.11E-05 |
| Interferon-induced protein with tetratricopeptide repeats 3                            | <i>Ifit3</i>     | 1.76255 | 6.40E-03 | 4.42E-04 |
| Interleukin 18                                                                         | <i>Il18</i>      | 1.52986 | 4.68E-03 | 3.00E-04 |
| Chemokine (C-C motif) receptor 6                                                       | <i>Ccr6</i>      | 1.37639 | 1.35E-03 | 6.35E-05 |
| Epithelial membrane protein 1                                                          | <i>Emp1</i>      | 1.28044 | 7.14E-06 | 1.77E-07 |
| Histocompatibility 2, class II antigen A, $\beta$ 1                                    | <i>H2-Ab1</i>    | 1.23486 | 3.00E-04 | 1.11E-05 |
| Interleukin 21 receptor                                                                | <i>Il21r</i>     | 1.21134 | 5.61E-04 | 2.27E-05 |
| Tumor necrosis factor receptor superfamily, member 10b                                 | <i>Tnfrsf10b</i> | 1.19788 | 1.50E-02 | 1.28E-03 |
| Nuclear factor of kappa light polypeptide gene enhancer in B cells inhibitor, $\alpha$ | <i>Nfkbia</i>    | 1.1736  | 8.73E-04 | 3.81E-05 |
| Guanylate binding protein 2b                                                           | <i>Gbp2b</i>     | 1.15584 | 1.28E-02 | 1.03E-03 |
| Anti-Mullerian hormone type 2 receptor                                                 | <i>Amhr2</i>     | 1.08817 | 8.73E-04 | 3.82E-05 |
| Selectin, platelet (p-selectin) ligand                                                 | <i>Selplg</i>    | 1.02693 | 3.21E-02 | 3.35E-03 |
| Mucosal vascular addressin cell adhesion molecule 1                                    | <i>Madcam1</i>   | 1.01299 | 4.93E-03 | 3.21E-04 |
| TRAF3 interacting protein 3                                                            | <i>Traf3ip3</i>  | 0.93662 | 1.10E-02 | 8.53E-04 |
| Cytidine deaminase                                                                     | <i>Cda</i>       | 0.9289  | 6.94E-03 | 4.99E-04 |
| 2'-5' oligoadenylate synthetase 1A                                                     | <i>Oas1a</i>     | 0.87346 | 2.94E-05 | 8.59E-07 |
| Histocompatibility 2, class II antigen E $\beta$ 2                                     | <i>H2-Eb2</i>    | 0.83882 | 1.43E-02 | 1.21E-03 |
| Chemokine (C-C motif) ligand 19                                                        | <i>Ccl19</i>     | 0.80013 | 1.84E-03 | 9.30E-05 |

|                                                                                  |                 |         |          |          |
|----------------------------------------------------------------------------------|-----------------|---------|----------|----------|
| Histocompatibility 2, class II antigen A, $\alpha$                               | <i>H2-Aa</i>    | 0.70998 | 8.82E-03 | 6.54E-04 |
| Lymphotoxin B                                                                    | <i>Ltb</i>      | 0.70568 | 2.76E-02 | 2.76E-03 |
| RAB27A, member RAS oncogene family                                               | <i>Rab27a</i>   | 0.69102 | 2.03E-02 | 1.89E-03 |
| Guanylate binding protein 2                                                      | <i>Gbp2</i>     | 0.65227 | 2.63E-02 | 2.58E-03 |
| Endothelin 1                                                                     | <i>Edn1</i>     | 0.6305  | 2.63E-03 | 1.54E-04 |
| Transmembrane and immunoglobulin domain containing 1                             | <i>Tmigd1</i>   | 0.62949 | 2.04E-03 | 1.08E-04 |
| Interferon regulatory factor 7                                                   | <i>Irf7</i>     | 0.61944 | 1.94E-03 | 1.00E-04 |
| Heparan sulfate (glucosamine) 3-O-sulfotransferase 3B1                           | <i>Hs3st3b1</i> | 0.56872 | 9.59E-03 | 7.22E-04 |
| SMAD family member 3                                                             | <i>Smad3</i>    | 0.53498 | 2.51E-02 | 2.42E-03 |
| Nuclear antigen Sp100                                                            | <i>Sp100</i>    | 0.48685 | 4.98E-02 | 5.66E-03 |
| <b>Downregulated genes</b>                                                       |                 |         |          |          |
| Complement receptor 2                                                            | <i>Cr2</i>      | -5.2193 | 4.19E-02 | 4.57E-03 |
| Metallothionein 2                                                                | <i>Mt2</i>      | -4.0879 | 9.89E-06 | 2.56E-07 |
| Chemokine (C-C motif) ligand 2                                                   | <i>Ccl2</i>     | -3.6923 | 2.63E-03 | 1.53E-04 |
| CD2 antigen                                                                      | <i>Cd2</i>      | -3.4363 | 6.10E-08 | 1.10E-09 |
| Phospholipase A2, group VII (platelet-activating factor acetylhydrolase, plasma) | <i>Pla2g7</i>   | -3.2754 | 8.39E-09 | 1.32E-10 |
| Cytochrome b-245, beta polypeptide                                               | <i>Cybb</i>     | -3.2693 | 3.25E-06 | 7.67E-08 |
| 2'-5' oligoadenylate synthetase 3                                                | <i>Oas3</i>     | -3.2321 | 2.98E-43 | 3.35E-46 |
| Histocompatibility 2, M region locus 3                                           | <i>H2-M3</i>    | -3.1173 | 1.28E-09 | 1.44E-11 |
| Tumor necrosis factor                                                            | <i>Tnf</i>      | -3.0967 | 2.07E-38 | 4.66E-41 |
| Carcinoembryonic antigen-related cell adhesion molecule 13                       | <i>Ceacam13</i> | -3.0565 | 7.45E-13 | 5.02E-15 |
| Bone marrow stromal cell antigen 1                                               | <i>Bst1</i>     | -3.0226 | 3.00E-04 | 1.08E-05 |
| CD48 antigen                                                                     | <i>Cd48</i>     | -2.9478 | 2.17E-07 | 4.15E-09 |
| 2'-5' oligoadenylate synthetase-like 1                                           | <i>Oasl1</i>    | -2.9434 | 2.68E-37 | 9.03E-40 |

|                                                    |                 |         |          |          |
|----------------------------------------------------|-----------------|---------|----------|----------|
| Chemokine (C-X-C motif) ligand 1                   | <i>Cxcl1</i>    | -2.9432 | 8.20E-05 | 2.58E-06 |
| SMAD family member 2                               | <i>Smad2</i>    | -2.5089 | 4.98E-02 | 5.73E-03 |
| Histone cluster 1, H1c                             | <i>Hist1h1c</i> | -2.4994 | 1.96E-12 | 1.54E-14 |
| Chemokine (C-X-C motif) ligand 2                   | <i>Cxcl2</i>    | -2.4367 | 1.95E-09 | 2.85E-11 |
| Fucosyltransferase 4                               | <i>Fut4</i>     | -2.4197 | 8.04E-11 | 7.23E-13 |
| CD177 antigen                                      | <i>Cd177</i>    | -2.3846 | 4.40E-03 | 2.72E-04 |
| Carbonic anhydrase 4                               | <i>Car4</i>     | -2.3158 | 1.39E-03 | 6.86E-05 |
| B lymphoid kinase                                  | <i>Blk</i>      | -2.1328 | 1.23E-05 | 3.32E-07 |
| Lymphocyte antigen 75                              | <i>Ly75</i>     | -2.0604 | 8.95E-04 | 4.12E-05 |
| Histocompatibility 2, T region locus 24            | <i>H2-T24</i>   | -2.0561 | 1.29E-02 | 1.07E-03 |
| CD74 antigen                                       | <i>Cd74</i>     | -1.9534 | 5.91E-04 | 2.46E-05 |
| T cell receptor associated transmembrane adaptor 1 | <i>Trat1</i>    | -1.9484 | 3.03E-02 | 3.07E-03 |
| Carboxypeptidase A3, mast cell                     | <i>Cpa3</i>     | -1.8726 | 1.90E-02 | 1.73E-03 |
| Kit oncogene                                       | <i>Kit</i>      | -1.8279 | 2.24E-13 | 1.26E-15 |
| Lymphocyte transmembrane adaptor 1                 | <i>Lax1</i>     | -1.8135 | 3.12E-02 | 3.19E-03 |
| Kynureninase (L-kynurenine hydrolase)              | <i>Kynu</i>     | -1.7685 | 1.34E-09 | 1.81E-11 |
| Interferon induced transmembrane protein 3         | <i>Ifitm3</i>   | -1.7126 | 6.18E-05 | 1.87E-06 |
| Interferon regulatory factor 1                     | <i>Irf1</i>     | -1.7119 | 2.69E-02 | 2.66E-03 |
| CD22 antigen                                       | <i>Cd22</i>     | -1.6939 | 1.26E-02 | 1.00E-03 |
| B and T lymphocyte associated                      | <i>Btla</i>     | -1.6385 | 9.68E-10 | 9.78E-12 |
| CD69 antigen                                       | <i>Cd69</i>     | -1.6102 | 1.48E-05 | 4.15E-07 |
| Malic enzyme 1, NADP(+)-dependent, cytosolic       | <i>Me1</i>      | -1.5944 | 1.90E-02 | 1.71E-03 |
| DEAD (Asp-Glu-Ala-Asp) box polypeptide 58          | <i>Ddx58</i>    | -1.5393 | 2.30E-03 | 1.27E-04 |
| Beta-2 microglobulin                               | <i>B2m</i>      | -1.5158 | 4.51E-03 | 2.84E-04 |
| Spi-B transcription factor (Spi-1/PU.1 related)    | <i>Spib</i>     | -1.4302 | 1.34E-09 | 1.69E-11 |



|                                                                    |                  |         |          |          |
|--------------------------------------------------------------------|------------------|---------|----------|----------|
| Glypican 4                                                         | <i>Gpc4</i>      | -1.4035 | 4.95E-02 | 5.56E-03 |
| CD52 antigen                                                       | <i>Cd52</i>      | -1.3942 | 5.39E-03 | 3.58E-04 |
| 2'-5' oligoadenylate synthetase 1G                                 | <i>Oas1g</i>     | -1.3506 | 4.18E-04 | 1.64E-05 |
| Three prime repair exonuclease 1                                   | <i>Trex1</i>     | -1.3436 | 2.29E-03 | 1.23E-04 |
| Optineurin                                                         | <i>Optn</i>      | -1.3247 | 1.25E-08 | 2.11E-10 |
| Apolipoprotein D                                                   | <i>Apod</i>      | -1.2874 | 6.43E-03 | 4.55E-04 |
| Myocyte enhancer factor 2C                                         | <i>Mef2c</i>     | -1.2523 | 1.53E-04 | 5.00E-06 |
| Lectin, galactose binding, soluble 9                               | <i>Lgals9</i>    | -1.2305 | 1.06E-02 | 8.10E-04 |
| 2'-5' oligoadenylate synthetase 1B                                 | <i>Oas1b</i>     | -1.2252 | 3.00E-03 | 1.79E-04 |
| Signal transducer and activator of transcription 3                 | <i>Stat3</i>     | -1.2118 | 3.33E-02 | 3.52E-03 |
| DnaJ heat shock protein family (Hsp40) member B1                   | <i>Dnajb1</i>    | -1.1764 | 3.00E-04 | 1.08E-05 |
| LPS-responsive beige-like anchor                                   | <i>Lrba</i>      | -1.1744 | 8.80E-04 | 3.95E-05 |
| Myelin and lymphocyte protein, T cell differentiation protein      | <i>Mal</i>       | -1.1117 | 4.98E-02 | 5.76E-03 |
| Immunoglobulin kappa constant                                      | <i>Igkc</i>      | -1.1016 | 2.44E-03 | 1.37E-04 |
| Interferon Induced Transmembrane Protein 3                         | <i>Ifitm3</i>    | -1.1015 | 2.44E-03 | 1.37E-04 |
| Serine (or cysteine) preptidase inhibitor, clade A, member 1B      | <i>Serpina1b</i> | -0.9767 | 1.92E-02 | 1.77E-03 |
| Acid phosphatase, prostate                                         | <i>Acpp</i>      | -0.9537 | 4.04E-04 | 1.54E-05 |
| Membrane-spanning 4-domains, subfamily A, member 1                 | <i>Ms4a1</i>     | -0.9392 | 3.14E-02 | 3.24E-03 |
| B cell scaffold protein with ankyrin repeats 1                     | <i>Bank1</i>     | -0.8961 | 5.07E-07 | 1.03E-08 |
| Indoleamine 2,3-dioxygenase 1                                      | <i>Ido1</i>      | -0.8774 | 1.63E-02 | 1.43E-03 |
| 2'-5' oligoadenylate synthetase 2                                  | <i>Oas2</i>      | -0.8606 | 2.10E-02 | 1.99E-03 |
| Protein tyrosine phosphatase, receptor type, C                     | <i>Ptprc</i>     | -0.8081 | 1.63E-02 | 1.43E-03 |
| Transient receptor potential cation channel, subfamily V, member 6 | <i>Trpv6</i>     | -0.7858 | 6.26E-03 | 4.22E-04 |
| IKAROS family zinc finger 2                                        | <i>Ikzf2</i>     | -0.7351 | 6.40E-03 | 4.46E-04 |
| Histocompatibility 2, O region alpha locus                         | <i>H2-Oa</i>     | -0.6812 | 1.28E-02 | 1.05E-03 |

|                                                            |                 |         |          |          |
|------------------------------------------------------------|-----------------|---------|----------|----------|
| Carcinoembryonic antigen-related cell adhesion molecule 12 | <i>Ceacam12</i> | -0.6733 | 4.92E-02 | 5.48E-03 |
| Zinc and ring finger 1                                     | <i>Znrf1</i>    | -0.6444 | 3.93E-02 | 4.24E-03 |
| Regulator of G-protein signaling 16                        | <i>Rgs16</i>    | -0.6152 | 7.96E-03 | 5.82E-04 |
| Paired box 5                                               | <i>Pax5</i>     | -0.5946 | 2.49E-02 | 2.38E-03 |
| CD19 antigen                                               | <i>Cd19</i>     | -0.5853 | 3.25E-03 | 1.97E-04 |
| Bone marrow stromal cell antigen 2                         | <i>Bst2</i>     | -1.582  | 4.19E-02 | 4.61E-03 |
| CD72 antigen                                               | <i>Cd72</i>     | -1.565  | 1.11E-02 | 8.72E-04 |
| Lysophosphatidylcholine acyltransferase 4                  | <i>Lpcat4</i>   | -1.355  | 2.42E-15 | 1.09E-17 |
| Protein tyrosine phosphatase, receptor type, J             | <i>Ptprj</i>    | -1.196  | 1.37E-03 | 6.61E-05 |

Genes are shown in descending order (log<sub>2</sub>FC values).

**Suppl. Tab. 7:** Pathways significantly altered by MC deficiency in sCRC preneoplastic lesions. Data were obtained by RNA-seq and analysed on DAVID (Bioinformatic Database).

| Pathway                                | Status        | p-Value  | Genes                                                                        |
|----------------------------------------|---------------|----------|------------------------------------------------------------------------------|
| Inflammatory bowel disease (IBD)       | Upregulated   | 3.40E-08 | <i>Smad3, H2-Aa, H2-Ab1, Il18, Il21r</i>                                     |
|                                        | Downregulated | 3.40E-08 | <i>Smad2, H2-Oa, Stat3, Tnf</i>                                              |
| Cytokine-cytokine receptor interaction | Upregulated   | 1.20E-07 | <i>Amhr2, Ccl19, Ccr6, Cxcl13, Cxcl5, Cxcr5, Il18, Il21r, Ltb, Tnfrsf10b</i> |
|                                        | Downregulated | 1.20E-07 | <i>Ccl2, Cxcl1, Cxcl2, Tnf</i>                                               |
| Antigen processing and presentation    | Upregulated   | 6.30E-06 | <i>H2-Aa, H2-Ab1</i>                                                         |
|                                        | Downregulated | 6.30E-06 | <i>Cd74, B2m, H2-M3, H2-Oa, H2-T24, Tnf</i>                                  |
| Cell adhesion molecules (CAMs)         | Upregulated   | 9.80E-06 | <i>H2-Aa, H2-Ab1, Madcam1, Selplg</i>                                        |
|                                        | Downregulated | 9.80E-06 | <i>Cd2, Cd22, H2-M3, H2-Oa, H2-T24, Ptprc</i>                                |
| Chemokine signaling pathway            | Upregulated   | 4.50E-05 | <i>Ccl19, Ccr6, Cxcl13, Cxcl5, Cxcr5, Nfbia</i>                              |
|                                        | Downregulated | 4.50E-05 | <i>Ccl2, Cxcl1, Cxcl2, Stat3</i>                                             |
| NOD-like receptor signaling pathway    | Downregulated | 1.30E-04 | <i>Ccl2, Cxcl1, Cxcl2, Tnf</i>                                               |
| Cytosolic DNA-sensing pathway          | Upregulated   | 2.20E-04 | <i>Zbp1, Irf7, Il18, Nfbia</i>                                               |
|                                        | Downregulated | 2.20E-04 | <i>Ddx58, Trex1</i>                                                          |
| TNF signaling                          | Downregulated | 2.50E-03 | <i>Ccl2, Cxcl1, Cxcl2, Tnf</i>                                               |
| B cell receptor signaling              | Downregulated | 3.10E-03 | <i>Cd19, Cd22, Cd72, Cr2</i>                                                 |
| TGF-beta signaling                     | Upregulated   | 3.80E-02 | <i>Smad3, Amhr2</i>                                                          |
|                                        | Downregulated | 3.80E-02 | <i>Smad2, Tnf</i>                                                            |

Acronyms meaning is given in Suppl. Tab. 6.

**Suppl. Tab. 8.** Mast cells are drugable targets altering the development of early colon tumorigenic events (AOM vs AOM+CA). Data were obtained by RNA-seq.

| Name                                                       | Acronym         | log <sub>2</sub> F<br>C | p-Adj        | p-Value  |
|------------------------------------------------------------|-----------------|-------------------------|--------------|----------|
| <b>Upregulated genes</b>                                   |                 |                         |              |          |
| ATP-binding cassette, sub-family G (WHITE), member 2       | <i>Abcg2</i>    | 0.9441<br>8             | 1.38E-<br>03 | 1.15E-05 |
| CDC14 cell division cycle 14A                              | <i>Cdc14a</i>   | 0.6245                  | 7.49E-<br>03 | 1.34E-04 |
| Frizzled class receptor 2                                  | <i>Fzd2</i>     | 0.5464<br>4             | 4.26E-<br>02 | 1.87E-03 |
| Caspase 1                                                  | <i>Casp1</i>    | 0.4698<br>8             | 4.26E-<br>02 | 1.77E-03 |
| Abhydrolase domain containing 2                            | <i>Abhd2</i>    | 0.4607<br>6             | 4.64E-<br>02 | 2.10E-03 |
| Nedd4 family interacting protein 1                         | <i>Ndfip1</i>   | 0.4589<br>7             | 1.95E-<br>02 | 5.34E-04 |
| Chemokine (C-X-C motif) ligand 12                          | <i>Cxcl12</i>   | 0.4473<br>5             | 2.23E-<br>02 | 7.68E-04 |
| <b>Downregulated genes</b>                                 |                 |                         |              |          |
| Chemokine (C-C motif) ligand 19                            | <i>Ccl19</i>    | -3.5472                 | 6.04E-<br>04 | 3.59E-06 |
| Interleukin 13                                             | <i>Il13</i>     | -3.4608                 | 4.91E-<br>02 | 2.40E-03 |
| T cell receptor associated transmembrane adaptor 1         | <i>Trat1</i>    | -2.8763                 | 2.23E-<br>02 | 7.54E-04 |
| Membrane-spanning subfamily A, member 1                    | <i>Ms4a1</i>    | -2.3658                 | 4.91E-<br>02 | 2.34E-03 |
| Complement receptor 2                                      | <i>Cr2</i>      | -2.3086                 | 4.90E-<br>03 | 7.57E-05 |
| CD19 antigen                                               | <i>Cd19</i>     | -1.9972                 | 1.29E-<br>03 | 9.18E-06 |
| Carcinoembryonic antigen-related cell adhesion molecule 12 | <i>Ceacam12</i> | -1.9074                 | 1.53E-<br>02 | 3.81E-04 |
| Chemokine (C-X-C motif) ligand 5                           | <i>Cxcl5</i>    | -1.794                  | 8.22E-<br>03 | 1.63E-04 |
| Nitric oxide synthase 2, inducible                         | <i>Nos2</i>     | -1.7376                 | 4.26E-<br>02 | 1.83E-03 |
| Ubiquitin D                                                | <i>Ubd</i>      | -1.5843                 | 3.95E-<br>04 | 1.88E-06 |
| CD22 antigen                                               | <i>Cd22</i>     | -1.5688                 | 2.08E-<br>02 | 5.93E-04 |
| Dual specificity phosphatase 2                             | <i>Dusp2</i>    | -1.5562                 | 4.90E-<br>03 | 7.42E-05 |
| Granzyme A                                                 | <i>Gzma</i>     | -1.5448                 | 1.12E-<br>02 | 2.40E-04 |
| Suppressor of cytokine signaling 1                         | <i>Socs1</i>    | -1.4443                 | 1.38E-<br>02 | 3.21E-04 |

|                                                     |                  |         |          |          |
|-----------------------------------------------------|------------------|---------|----------|----------|
| Spi-B transcription factor                          | <i>Spib</i>      | -1.4357 | 2.23E-02 | 7.69E-04 |
| Chemokine (C-C motif) receptor 6                    | <i>Ccr6</i>      | -1.3625 | 4.71E-02 | 2.19E-03 |
| Zeta-chain associated protein kinase                | <i>Zap70</i>     | -1.1181 | 2.25E-02 | 8.01E-04 |
| CD72 antigen                                        | <i>Cd72</i>      | -1.0918 | 3.63E-02 | 1.38E-03 |
| Serine peptidase inhibitor, clade A, member 3N      | <i>Serpina3n</i> | -1.0806 | 1.38E-02 | 3.27E-04 |
| Proteasome subunit, beta type 9                     | <i>Psmb9</i>     | -1.0404 | 1.91E-06 | 2.27E-09 |
| Chemokine (C-C motif) ligand 5                      | <i>Ccl5</i>      | -1.0292 | 1.58E-04 | 5.63E-07 |
| Z-DNA binding protein 1                             | <i>Zbp1</i>      | -0.964  | 3.60E-03 | 4.70E-05 |
| Natural killer cell group 7 sequence                | <i>Nkg7</i>      | -0.8674 | 2.32E-03 | 2.21E-05 |
| Transporter 1, ATP-binding cassette, sub-family B   | <i>Tap1</i>      | -0.8594 | 8.22E-03 | 1.66E-04 |
| CD74 antigen                                        | <i>Cd74</i>      | -0.7109 | 4.47E-05 | 1.06E-07 |
| Centromere protein F                                | <i>Cenpf</i>     | -0.705  | 1.64E-02 | 4.28E-04 |
| Histocompatibility 2, class II antigen A, $\beta$ 1 | <i>H2-Ab1</i>    | -0.7036 | 6.03E-03 | 1.00E-04 |
| Antigen identified by monoclonal antibody Ki 67     | <i>Mki67</i>     | -0.6661 | 2.39E-02 | 8.81E-04 |
| Baculoviral IAP repeat-containing 5                 | <i>Birc5</i>     | -0.6435 | 2.23E-02 | 7.02E-04 |
| Histocompatibility 2, Q region locus 4              | <i>H2-Q4</i>     | -0.624  | 2.22E-02 | 6.60E-04 |
| Histocompatibility 2, class II antigen A, $\alpha$  | <i>H2-Aa</i>     | -0.5918 | 2.86E-03 | 3.40E-05 |
| Histocompatibility 2, class II antigen E $\beta$    | <i>H2-Eb1</i>    | -0.5903 | 2.86E-03 | 3.20E-05 |
| Histocompatibility 2, M region locus 3              | <i>H2-M3</i>     | -0.5693 | 3.97E-02 | 1.56E-03 |
| Proteasome subunit, beta type 10                    | <i>Psmb10</i>    | -0.4267 | 3.99E-02 | 1.61E-03 |

According to their log<sub>2</sub>FC values, genes are shown in descending order.

**Suppl. Tab. 9.** Mast cells are drugable targets altering the development of early tumorigenic events in the colon (AOM vs AOM → CA). Data were obtained by RNA-seq.

| Name                                                       | Acronym         | log2FC  | p-Adj    | p-Value  |
|------------------------------------------------------------|-----------------|---------|----------|----------|
| <b>Upregulated genes</b>                                   |                 |         |          |          |
| γ-glutamyltransferase 1                                    | <i>Ggt1</i>     | 2.69378 | 4.80E-02 | 2.10E-03 |
| Chemokine (C-C motif) ligand 3                             | <i>Ccl3</i>     | 1.53774 | 4.76E-02 | 2.00E-03 |
| Leucine rich repeat containing 32                          | <i>Lrrc32</i>   | 1.29369 | 2.59E-02 | 6.35E-04 |
| CD36 antigen                                               | <i>Cd36</i>     | 1.083   | 2.87E-02 | 7.37E-04 |
| Interleukin 15                                             | <i>Il15</i>     | 1.04341 | 4.90E-02 | 2.23E-03 |
| Hairy/enhancer-of-split related with YRPW motif 1          | <i>Hey1</i>     | 1.00961 | 4.76E-02 | 1.96E-03 |
| Alanyl (membrane) aminopeptidase                           | <i>Anpep</i>    | 0.83758 | 3.15E-02 | 1.06E-03 |
| Spondin 2, extracellular matrix protein                    | <i>Spon2</i>    | 0.80936 | 1.41E-02 | 1.97E-04 |
| Cysteine-rich secretory protein LCCL domain containing 2   | <i>Crispld2</i> | 0.7985  | 2.38E-02 | 4.99E-04 |
| CD34 antigen                                               | <i>Cd34</i>     | 0.79222 | 1.23E-02 | 1.20E-04 |
| Collagen, type III, alpha 1                                | <i>Col3a1</i>   | 0.61973 | 2.10E-02 | 3.91E-04 |
| Frizzled class receptor 2                                  | <i>Fzd2</i>     | 0.6149  | 2.16E-02 | 4.28E-04 |
| Vascular endothelial growth factor C                       | <i>Vegfc</i>    | 0.59837 | 4.80E-02 | 2.13E-03 |
| Acid phosphatase, prostate                                 | <i>Acpp</i>     | 0.59654 | 4.44E-02 | 1.76E-03 |
| Insulin-like growth factor binding protein 5               | <i>Igfbp5</i>   | 0.56027 | 3.11E-02 | 9.31E-04 |
| Chemokine (C-X-C motif) ligand 12                          | <i>Cxcl12</i>   | 0.54604 | 6.64E-03 | 3.87E-05 |
| CDC14 cell division cycle 14A                              | <i>Cdc14a</i>   | 0.536   | 3.11E-02 | 9.68E-04 |
| <b>Downregulated genes</b>                                 |                 |         |          |          |
| Chemokine (C-C motif) ligand 19                            | <i>Ccl19</i>    | -4.111  | 4.56E-05 | 5.32E-08 |
| T cell receptor associated transmembrane adaptor 1         | <i>Trat1</i>    | -3.2211 | 1.23E-02 | 1.58E-04 |
| Cochlin                                                    | <i>Coch</i>     | -3.1581 | 4.44E-02 | 1.74E-03 |
| Carcinoembryonic antigen-related cell adhesion molecule 12 | <i>Ceacam12</i> | -2.6061 | 2.15E-04 | 7.51E-07 |

|                                                      |                |         |          |          |
|------------------------------------------------------|----------------|---------|----------|----------|
| Membrane-spanning 4-domains, subfamily A, member 1   | <i>Ms4a1</i>   | -2.5536 | 3.11E-02 | 1.01E-03 |
| Chemokine (C-C motif) receptor 7                     | <i>Ccr7</i>    | -2.3446 | 1.23E-02 | 1.56E-04 |
| Complement receptor 2                                | <i>Cr2</i>     | -2.3063 | 1.06E-02 | 7.38E-05 |
| CD19 antigen                                         | <i>Cd19</i>    | -2.2856 | 1.40E-04 | 3.26E-07 |
| Cystatin F (leukocystatin)                           | <i>Cst7</i>    | -2.2784 | 4.95E-02 | 2.31E-03 |
| Histocompatibility 2, class II antigen E $\beta$ 2   | <i>H2-Eb2</i>  | -1.8299 | 2.55E-02 | 5.95E-04 |
| CD22 antigen                                         | <i>Cd22</i>    | -1.7512 | 1.23E-02 | 1.18E-04 |
| Histocompatibility 2, O region $\alpha$ locus        | <i>H2-Oa</i>   | -1.7194 | 3.56E-02 | 1.25E-03 |
| B cell scaffold protein with ankyrin repeats 1       | <i>Bank1</i>   | -1.5358 | 2.55E-02 | 5.92E-04 |
| Chemokine (C-X-C motif) ligand 5                     | <i>Cxcl5</i>   | -1.5001 | 4.42E-02 | 1.65E-03 |
| Chemokine (C-C motif) receptor 6                     | <i>Ccr6</i>    | -1.4843 | 2.91E-02 | 7.79E-04 |
| Dual specificity phosphatase 2                       | <i>Dusp2</i>   | -1.4269 | 1.70E-02 | 2.77E-04 |
| Spi-B transcription factor                           | <i>Spib</i>    | -1.4116 | 3.11E-02 | 9.09E-04 |
| Nuclear receptor subfamily 4, group A, member 2      | <i>Nr4a2</i>   | -1.3889 | 1.55E-02 | 2.35E-04 |
| Tumor necrosis factor receptor superfamily, member 8 | <i>Tnfrsf8</i> | -1.2221 | 4.99E-02 | 2.40E-03 |
| Histocompatibility 2, T region locus 24              | <i>H2-T24</i>  | -1.1875 | 4.42E-02 | 1.64E-03 |
| Histocompatibility 2, M region locus 2               | <i>H2-M2</i>   | -1.1742 | 4.99E-02 | 2.44E-03 |
| Z-DNA binding protein 1                              | <i>Zbp1</i>    | -0.9897 | 6.06E-03 | 2.82E-05 |
| Epithelial membrane protein 1                        | <i>Empl</i>    | -0.9596 | 1.92E-02 | 3.36E-04 |
| Melanophilin                                         | <i>Mlph</i>    | -0.936  | 1.23E-02 | 1.56E-04 |
| Protein tyrosine phosphatase, receptor type, C       | <i>Ptprc</i>   | -0.8487 | 3.11E-02 | 9.96E-04 |
| Centromere protein F                                 | <i>Cenpf</i>   | -0.705  | 1.64E-02 | 4.28E-04 |
| Histocompatibility 2, class II antigen A, $\beta$ 1  | <i>H2-Ab1</i>  | -0.7036 | 6.03E-03 | 1.00E-04 |
| Antigen identified by monoclonal antibody Ki 67      | <i>Mki67</i>   | -0.6661 | 2.39E-02 | 8.81E-04 |
| Baculoviral IAP repeat-containing 5                  | <i>Birc5</i>   | -0.6435 | 2.23E-02 | 7.02E-04 |

|                                                    |               |         |          |          |
|----------------------------------------------------|---------------|---------|----------|----------|
| Histocompatibility 2, Q region locus 4             | <i>H2-Q4</i>  | -0.624  | 2.22E-02 | 6.60E-04 |
| Histocompatibility 2, class II antigen A, $\alpha$ | <i>H2-Aa</i>  | -0.5918 | 2.86E-03 | 3.40E-05 |
| Histocompatibility 2, class II antigen E $\beta$   | <i>H2-Eb1</i> | -0.5903 | 2.86E-03 | 3.20E-05 |
| Histocompatibility 2, M region locus 3             | <i>H2-M3</i>  | -0.5693 | 3.97E-02 | 1.56E-03 |
| Proteasome subunit, beta type 10                   | <i>Psmb10</i> | -0.4267 | 3.99E-02 | 1.61E-03 |

---

Genes are shown in descending order (log2FC values).



**Suppl. Tab. 10:** Pathways significantly altered by MC deficiency in early tumorigenic events in the colon (AOM vs AOM → CA). Data were obtained by RNA-seq and analysed on DAVID (Bioinformatic Database).

| Pathway                                      | Status        | p-Value | Genes                                                                  |
|----------------------------------------------|---------------|---------|------------------------------------------------------------------------|
| Cell adhesion molecules                      | Downregulated | 1.2E-8  | <i>Cd34, H2-M2, H2-M3, H2-Oa, H2-T24, H2-Ab1, H2-Aa, H2-Eb1, Ptprc</i> |
| Intestinal immune network for IgA production | Downregulated | 6.9E-7  | <i>H2-Oa, H2-Aa, H2-Ab1, H2-Eb1</i>                                    |
| Intestinal immune network for IgA production | Upregulated   | 6.9E-7  | <i>Cxcl12, Il15</i>                                                    |
| Antigen processing and presentation          | Downregulated | 8.9E-7  | <i>H2-M2, H2-M3, H2-Oa, H2-T24, H2-Ab1, H2-Aa, H2-Eb1</i>              |
| Cytokine-cytokine receptor interaction       | Upregulated   | 4.8E-5  | <i>Ccl3, Il15, Cxcl12</i>                                              |
|                                              | Downregulated | 4.8E-5  | <i>Ccl19, Ccr6, Ccr7, Cxcl5, Tnfrsf8</i>                               |
| Chemokine signaling pathway                  | Upregulated   | 1.2E-3  | <i>Ccl9, Ccl3, Cxcl12</i>                                              |
|                                              | Downregulated | 1.2E-3  | <i>Ccr6, Ccr7, Cxcl5</i>                                               |
| B cell receptor signaling pathway            | Downregulated | 3.4E-2  | <i>Cd19, Cd22, Cr2</i>                                                 |

Acronyms meaning is given in Suppl. Tab. 9.

**Suppl. Tab 11:** Pathways significantly altered by MC deficiency in early tumorigenic events in the colon (AOM vs AOM+CA). Data were obtained by RNA-seq and analysed on DAVID (Bioinformatic Database).

| Pathway                                      | Status        | p-Value | Genes                                           |
|----------------------------------------------|---------------|---------|-------------------------------------------------|
| Antigen processing and presentation          | Downregulated | 1.2E-5  | <i>Cd74, H2-M3, H2-Aa, H2-Ab1, H2-Eb1, Tap1</i> |
| Intestinal immune network for IgA production | Downregulated | 5.0E-4  | <i>H2-Aa, H2-Ab1, H2-Eb1</i>                    |
| Inflammatory bowel disease (IBD)             | Downregulated | 1.4E-3  | <i>H2-Aa, H2-Ab1, H2-Eb1, Il13</i>              |
| Cytokine-cytokine receptor interaction       | Downregulated | 1.9E-3  | <i>Ccl19, Ccl5, Ccr6, Cxcl5, Il13</i>           |
| B cell receptor signaling pathway            | Downregulated | 2.2E-3  | <i>Cd19, Cd22, Cd72, Cr2</i>                    |
| Cell adhesion molecules (CAMs)               | Downregulated | 3.0E-3  | <i>Cd22, H2-M3, H2-Aa, H2-Ab1, H2-Eb1</i>       |
| Chemokine signaling pathway                  | Downregulated | 5.9E-3  | <i>Ccl19, Ccl5, Ccr6, Cxcl5</i>                 |
| NF-kappa B signaling pathway                 | Downregulated | 5.1E-2  | <i>Ccl19, Zap70</i>                             |

Acronyms meaning is given in Suppl. Tab. 9.

**Suppl. Tab. 12.** Significantly altered genes by MC deficiency in allograft tumors (*Kit<sup>B6</sup>* vs *Kit<sup>W<sup>sh</sup></sup>*). Data were obtained by RNA-seq.

| Name                                                             | Acronym       | log2FC   | p-Adj    | p-Value  |
|------------------------------------------------------------------|---------------|----------|----------|----------|
| <b>Upregulated genes</b>                                         |               |          |          |          |
| RNA binding motif protein 3                                      | <i>Rbm3</i>   | 8.39E+14 | 1.37E+14 | 1.77E+09 |
| Cell adhesion molecule 1                                         | <i>Cadm1</i>  | 8.37E+14 | 1.18E+14 | 3.38E+14 |
| Proteasome (prosome, macropain) subunit, alpha type 2            | <i>Psm2</i>   | 8.01E+14 | 7.53E+14 | 1.79E+14 |
| Proteasome (prosome, macropain) subunit, beta type 7             | <i>Psm7</i>   | 7.85E+14 | 1.44E+14 | 4.74E+14 |
| Proteasome (prosome, macropain) inhibitor subunit 1              | <i>Psmf1</i>  | 7.58E+14 | 4.88E+14 | 3.53E+14 |
| Caspase 1                                                        | <i>Casp1</i>  | 7.57E+14 | 1.63E+14 | 2.56E+09 |
| Tryptase alpha/beta 1                                            | <i>Tpsab1</i> | 7.50E+14 | 1.07E+02 | 3.07E-01 |
| Proteasome (prosome, macropain) subunit, beta type 5             | <i>Psm5</i>   | 7.13E+14 | 4.49E+14 | 2.70E+14 |
| Carboxypeptidase A3, mast cell                                   | <i>Cpa3</i>   | 6.78E+14 | 6.11E-26 | 8.74E-29 |
| Interferon induced transmembrane protein 3                       | <i>Ifitm3</i> | 6.53E+14 | 1.18E+14 | 3.31E+14 |
| Tryptase beta 2                                                  | <i>Tpsb2</i>  | 6.49E+14 | 1.57E+03 | 6.75E+00 |
| Proteasome (prosome, macropain) activator subunit 1 (PA28 alpha) | <i>Psm1</i>   | 6.39E+13 | 2.00E+14 | 8.02E+14 |
| Proteasome (prosome, macropain) 26S subunit, non-atpase, 6       | <i>Psm6</i>   | 6.13E+14 | 3.25E+14 | 1.48E+14 |
| Proteasome (prosome, macropain) subunit, alpha type 4            | <i>Psm4</i>   | 5.97E+14 | 3.47E+14 | 1.74E+14 |
| Lectin, galactose binding, soluble 9                             | <i>Lgals9</i> | 5.50E+14 | 4.88E+14 | 3.10E+14 |
| Chemokine (C-C motif) receptor 5                                 | <i>Ccr5</i>   | 5.50E+14 | 1.58E+14 | 5.87E+14 |
| Vascular cell adhesion molecule 1                                | <i>Vcam1</i>  | 5.10E+14 | 3.47E+14 | 1.71E+14 |
| Macrophage scavenger receptor 1                                  | <i>Msr1</i>   | 4.89E+14 | 4.88E+14 | 3.30E+14 |
| Proteasome (prosome, macropain) activator subunit 2 (PA28 beta)  | <i>Psm2</i>   | 4.84E+14 | 1.84E+14 | 7.09E+14 |
| Catalase                                                         | <i>Cat</i>    | 4.55E+14 | 4.46E+14 | 2.62E+14 |
| Regulator of G-protein signaling 2                               | <i>Rgs2</i>   | 4.49E+14 | 4.36E+14 | 2.43E+14 |

|                                                                            |                 |           |          |          |
|----------------------------------------------------------------------------|-----------------|-----------|----------|----------|
| Hepatitis A virus cellular receptor 2                                      | <i>Havcr2</i>   | 4.38E+14  | 4.88E+14 | 3.37E+13 |
| Beta-2 microglobulin                                                       | <i>B2m</i>      | 3.92E+14  | 4.18E+14 | 2.16E+14 |
| Chemokine (C motif) ligand 1                                               | <i>Xcl1</i>     | 1.00E+14  | 2.56E+13 | 1.09E+14 |
| <b>Downregulated genes</b>                                                 |                 |           |          |          |
| Basic leucine zipper transcription factor, ATF-like                        | <i>Batf</i>     | -5.87E+14 | 4.88E+14 | 3.56E+14 |
| Chemokine (C-C motif) receptor 3                                           | <i>Ccr3</i>     | -2.03E+14 | 2.56E+13 | 1.10E+14 |
| CD163 antigen                                                              | <i>Cd163</i>    | -3.19E+12 | 5.71E+14 | 5.72E+08 |
| CD5 antigen                                                                | <i>Cd5</i>      | -1.27E+13 | 1.18E+14 | 3.34E+14 |
| Class II transactivator                                                    | <i>Ciita</i>    | -8.39E+14 | 1.91E+14 | 3.27E+09 |
| C-type lectin domain family 10, member A                                   | <i>Clec10a</i>  | -1.99E+14 | 7.53E+14 | 1.83E+14 |
| Colony stimulating factor 1 receptor                                       | <i>Csf1r</i>    | -6.71E+14 | 4.27E+14 | 2.32E+14 |
| Dual specificity phosphatase 5                                             | <i>Dusp5</i>    | -8.73E+14 | 4.27E+14 | 2.32E+14 |
| Coagulation factor XIII, A1 subunit                                        | <i>F13a1</i>    | -1.34E+14 | 1.46E+14 | 5.09E+14 |
| Histocompatibility 2, class II antigen A, beta 1                           | <i>H2-Ab1</i>   | -6.65E+14 | 9.83E+14 | 1.12E+09 |
| Histocompatibility 2, class II antigen E beta                              | <i>H2-Eb1</i>   | -8.66E+14 | 3.16E+14 | 2.71E+08 |
| Histone cluster 1, h1c                                                     | <i>Hist1h1c</i> | -8.62E+14 | 3.25E+14 | 1.49E+14 |
| Interleukin 13                                                             | <i>Il13</i>     | -1.89E+14 | 4.88E+14 | 3.56E+14 |
| K(lysine) acetyltransferase 6 <sup>a</sup>                                 | <i>Kat6a</i>    | -5.78E+13 | 1.23E+14 | 3.78E+14 |
| Leptin receptor overlapping transcript                                     | <i>Leprot</i>   | -8.37E+14 | 1.63E+14 | 2.50E+09 |
| MAP-kinase activating death domain                                         | <i>Madd</i>     | -7.40E+14 | 4.44E+14 | 2.54E+14 |
| Avian musculoaponeurotic fibrosarcoma oncogene homolog                     | <i>Maf</i>      | -1.22E+14 | 1.46E+14 | 5.23E+13 |
| Nuclear factor of kappa light polypeptide gene enhancer in B cells 1, p105 | <i>Nfkb1</i>    | -4.57E+14 | 6.19E+14 | 1.24E+13 |
| Nudix (nucleoside diphosphate linked moiety X)-type motif 9                | <i>Nudt9</i>    | -6.03E+14 | 1.23E+14 | 3.87E+14 |
| Programmed cell death 1 ligand 2                                           | <i>Pdcd1lg2</i> | -1.56E+14 | 6.66E+14 | 1.43E+14 |
| Proteoglycan 2, bone marrow                                                | <i>Prg2</i>     | -4.22E+14 | 2.19E+14 | 4.07E+09 |
| Solute carrier family 15 (H+/peptide transporter), member 2                | <i>Slc15a2</i>  | -8.60E+13 | 1.67E+14 | 1.20E+08 |

|                                                                                |                |           |          |          |
|--------------------------------------------------------------------------------|----------------|-----------|----------|----------|
| Solute carrier family 7 (cationic amino acid transporter, y+ system), member 8 | <i>Slc7a8</i>  | -6.46E+14 | 4.83E+14 | 2.97E+14 |
| Suppressor of cytokine signaling 1                                             | <i>Socs1</i>   | -5.57E+14 | 3.47E+14 | 1.65E+14 |
| Spondin 2, extracellular matrix protein                                        | <i>Spon2</i>   | -1.61E+14 | 4.88E+14 | 3.28E+13 |
| Tumor-associated calcium signal transducer 2                                   | <i>Tacstd2</i> | -2.22E+13 | 4.88E+14 | 3.56E+14 |
| Thrombospondin 4                                                               | <i>Thbs4</i>   | -2.78E+14 | 3.85E+09 | 2.20E+07 |

According to their log<sub>2</sub>FC values, genes are shown in descending order.

**Suppl. Tab. 13:** Pathways significantly altered by MC deficiency in in allograftic tumors.. Data were obtained by RNA-seq and analysed on DAVID (Bioinformatic Database).

| Pathway                                | Status        | p-Value | Genes                                                                                                                                        |
|----------------------------------------|---------------|---------|----------------------------------------------------------------------------------------------------------------------------------------------|
| Proteasome                             | Downregulated | 8.6E-10 | <i>Psm6,</i><br><i>Psm1,</i><br><i>Psm2,</i><br><i>Psmf1,</i><br><i>Psm2,</i><br><i>Psm4,</i><br><i>Psm4,</i><br><i>Psm5,</i><br><i>Psm7</i> |
|                                        |               |         | <i>Ciita, H2-Ab1, H2-Eb1</i>                                                                                                                 |
| Antigen processing and presentation    | Upregulated   | 3.1E-5  | <i>B2m, Psm1,</i><br><i>Psm2</i>                                                                                                             |
|                                        | Downregulated | 3.1E-5  | <i>Maf, H2-Ab1, H2-Eb1, Il13, Nfkb1</i>                                                                                                      |
| Inflammatory bowel disease (IBD)       | Upregulated   | 1.4E-4  | <i>H2-Ab1, H2-Eb1, Pcd11g2</i>                                                                                                               |
| Cell adhesion molecules (CAMs)         | Upregulated   | 6.0E-3  | <i>Cadm1,</i><br><i>Vcam1</i>                                                                                                                |
|                                        | Downregulated | 6.0E-3  | <i>Ccr5, Xcl1</i>                                                                                                                            |
| Cytokine-cytokine receptor interaction | Downregulated | 2.3E-2  | <i>Ccr3, Csf1r, Il13</i>                                                                                                                     |
|                                        | Upregulated   | 2.3E-2  | <i>Xcl1, Ccr5</i>                                                                                                                            |
| Chemokine signaling pathway            | Downregulated | 5.9E-2  | <i>Ccr3, Nfkb1</i>                                                                                                                           |
|                                        | Upregulated   | 5.9E-2  |                                                                                                                                              |

Acronyms meaning is given in Suppl. Tab. 12.
